# Supplementary material
Source: PubMed Central journal article supplement (PMC7486280)
Supplement: NIHMS1613699-supplement-SI.pdf [file NIHMS1613699-supplement-SI.pdf]

## Supporting Information

### Selective Peptidomimetic Inhibitors of NTMT1/2: Rational design, synthesis, characterization, and crystallographic studies

Brianna D. Mackie,<sup>†</sup> Dongxing Chen,<sup>‡</sup> Guangping Dong,<sup>‡</sup> Cheng Dong,<sup>¶</sup> Haley Parker,<sup>#</sup> Christine E. Schaner Tooley,<sup>#</sup> Nicholas Noinaj,<sup>§</sup> Jinrong Min,<sup>¶</sup> and Rong Huang<sup>\*,†,‡</sup>

<sup>†</sup>Department of Medicinal Chemistry, Institute of Structural Biology, Drug Discovery and Development, School of Pharmacy, Virginia Commonwealth University, Richmond, VA 23298, United States

<sup>‡</sup>Department of Medicinal Chemistry and Molecular Pharmacology, Purdue Institute for Drug Discovery, Purdue University Center for Cancer Research, Purdue University, West Lafayette, IN 47907, United States

<sup>¶</sup>Structural Genomics Consortium, Department of Physiology, University of Toronto, Toronto, Ontario, Canada.

<sup>#</sup>Department of Biochemistry, Jacobs School of Medicine and Biomedical Sciences, University at Buffalo, Buffalo, NY 14203, United States

<sup>§</sup>Department of Biological Sciences, Markey Center for Structural Biology, and the Purdue Institute of Inflammation, Immunology and Infectious Disease, Purdue University, West Lafayette, IN 47907, United States

\* To whom correspondence should be addressed. E-mail: [huang-r@purdue.edu](mailto:huang-r@purdue.edu)

## Table of Contents

- A. Supporting Figure S1. MALDI-MS and HPLC analysis of compounds **1-24**, **DC431** and **DC432**
- B. Supporting Figure S2. IC<sub>50</sub> curves of compounds **5**
- C. Supporting Figure S3. IC<sub>50</sub> curves of compounds **6 (BM30)**
- D. Supporting Figure S4. Cell permeability evaluation
- E. Supporting Table S1. Selectivity study **BM30** and **22** against G9a and PRMT1
- F. Supporting Table S2. Selectivity study of **BM30** against a panel of 41 MTases (Reaction Biology)
- G. Supporting Table S3. Crystallography data and refinement statistics
- H. Supporting Table S4. IC<sub>50</sub> values and binding affinities of BM30 and its cell-permeable analogs

**Figure S1.** MALDI-MS and HPLC analysis of compounds 1-24, DC431 and DC432

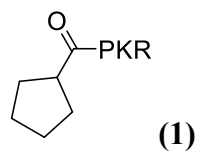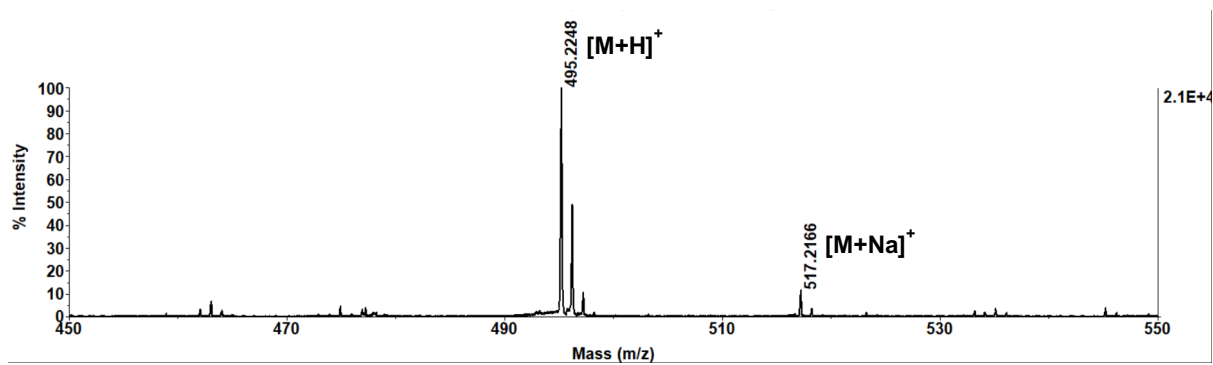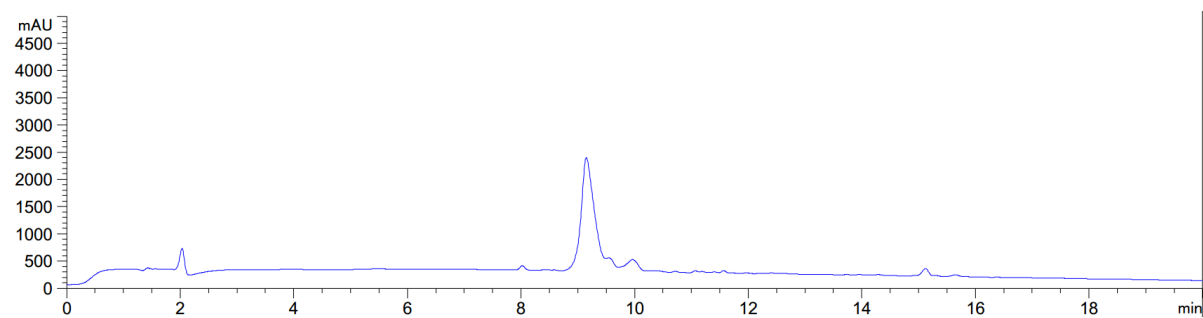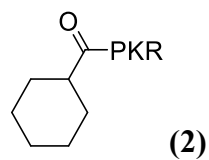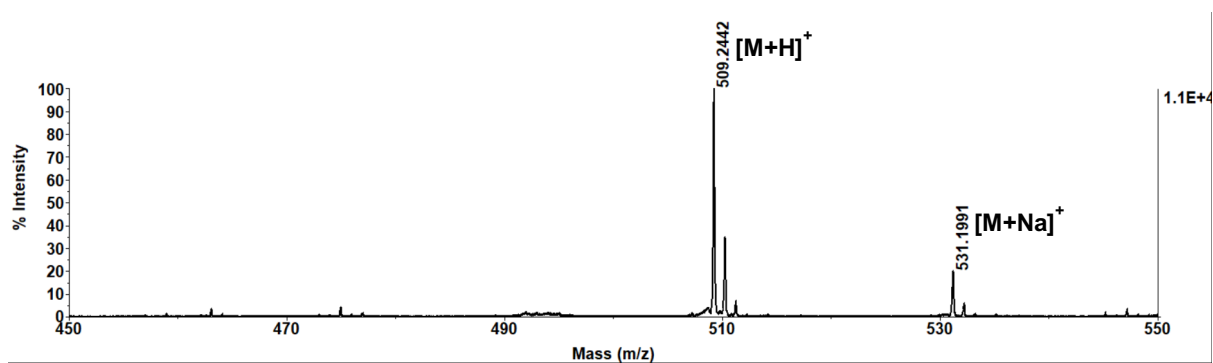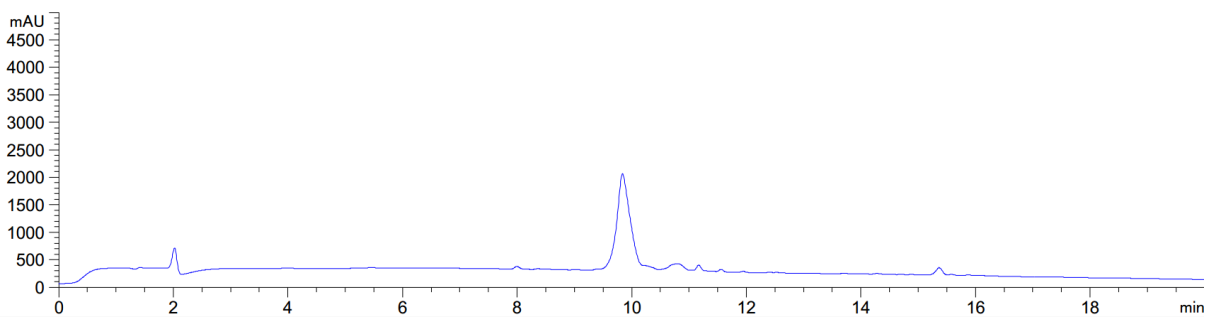

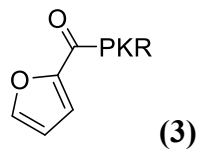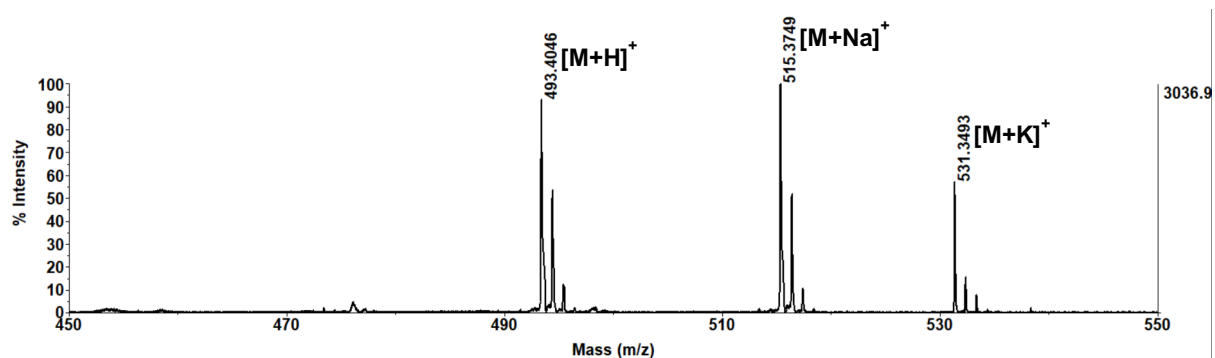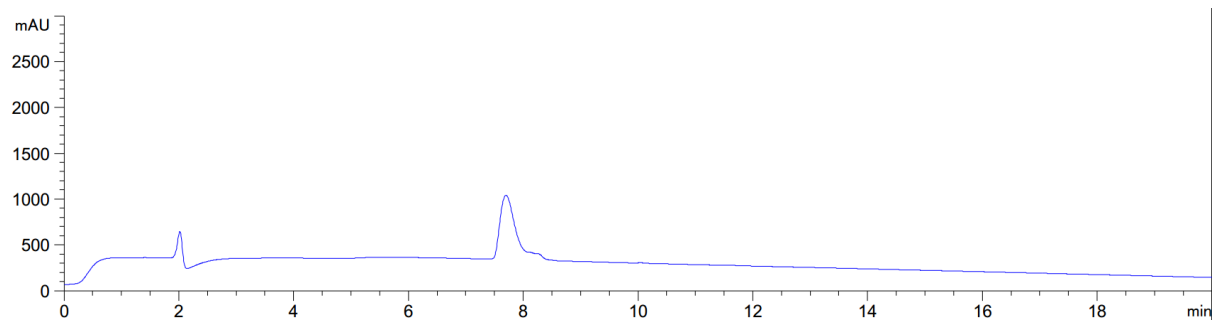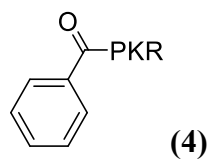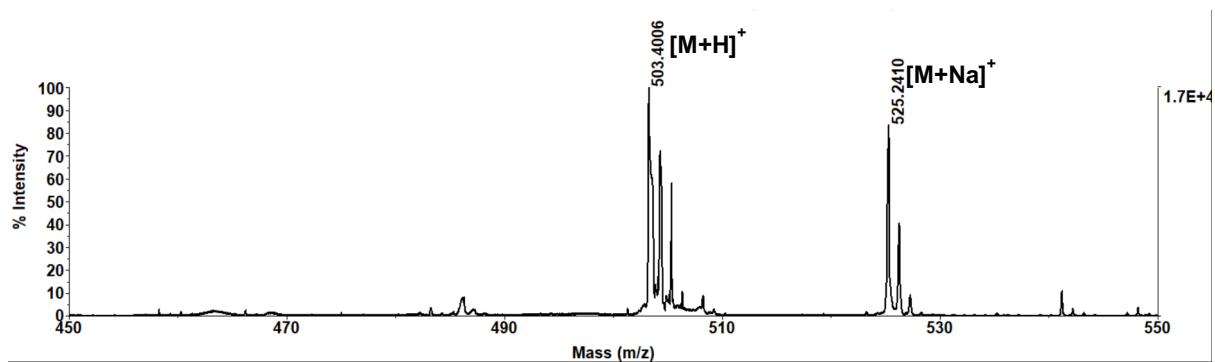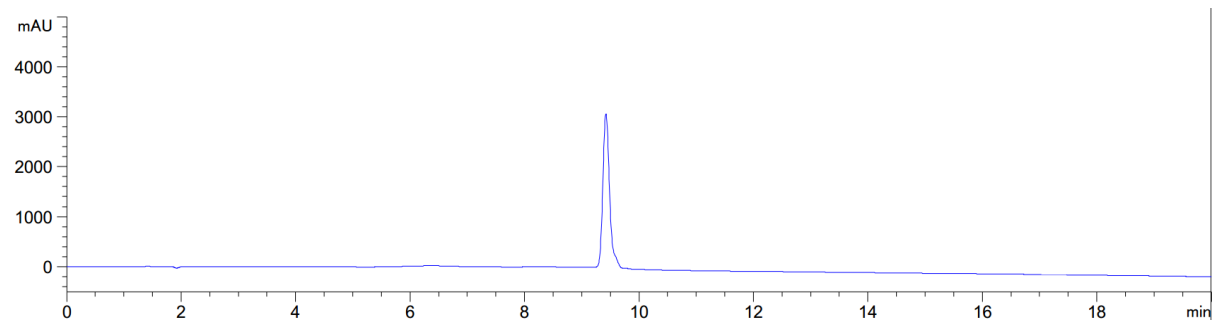

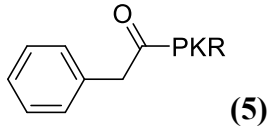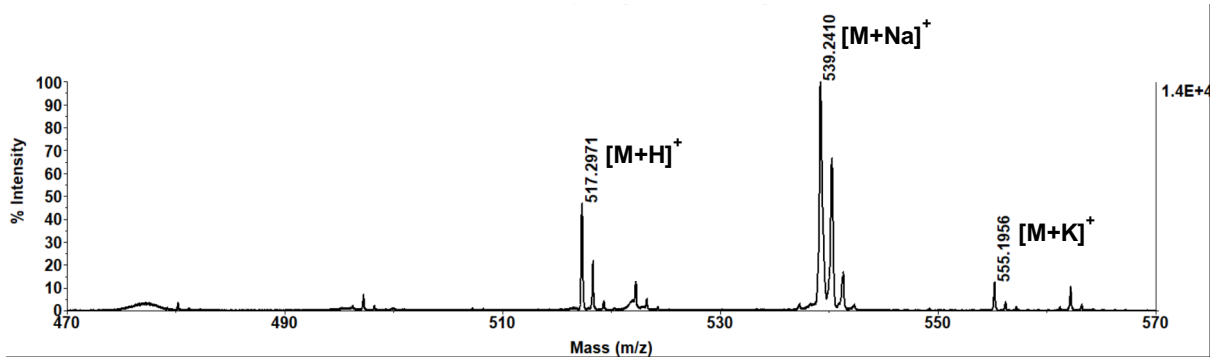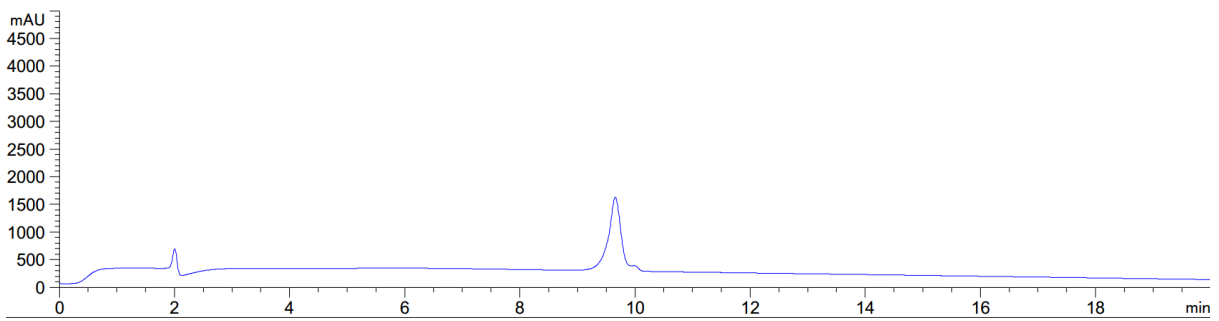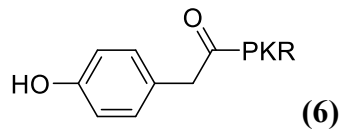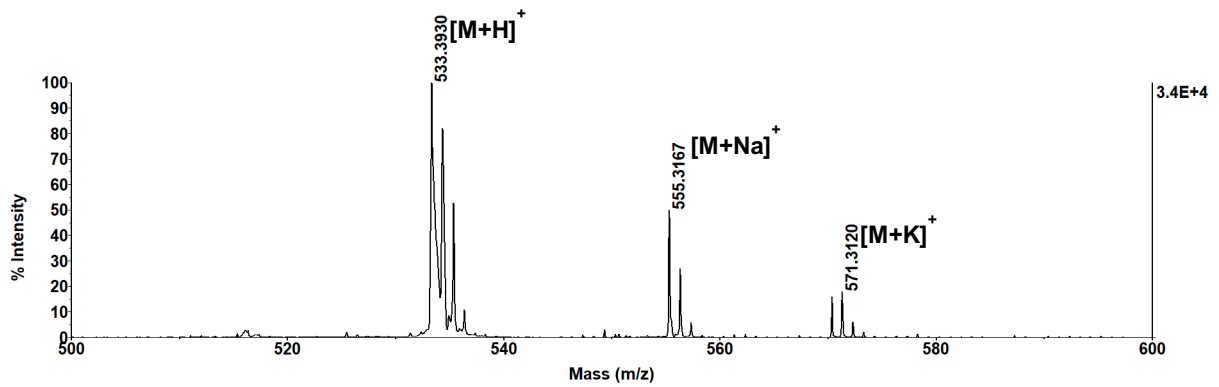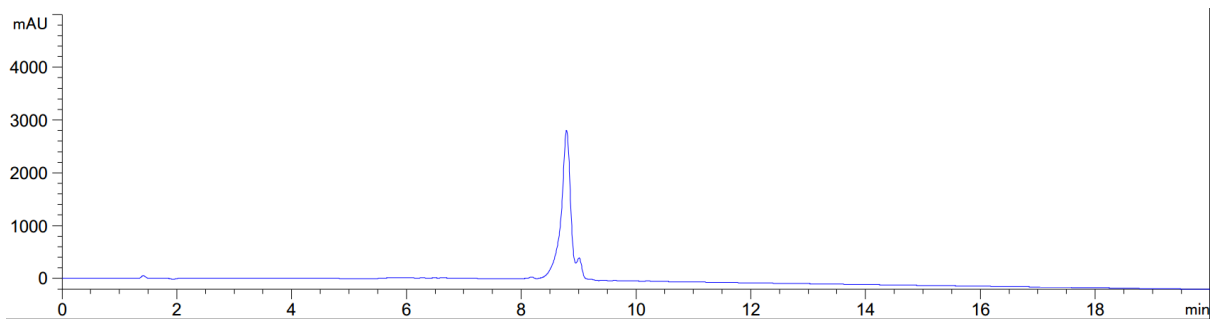

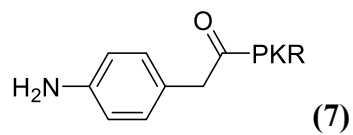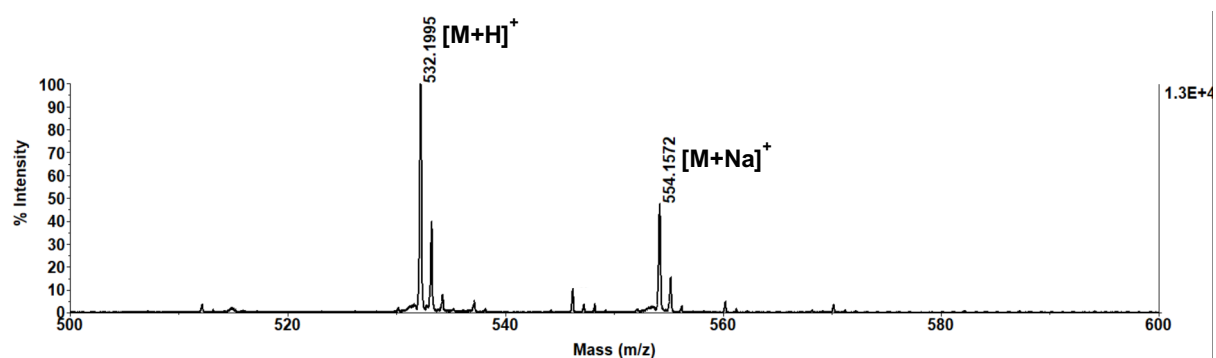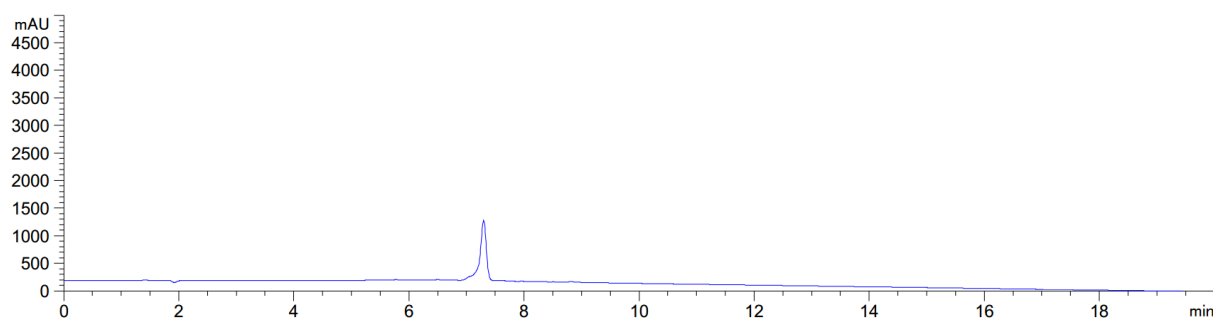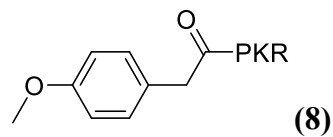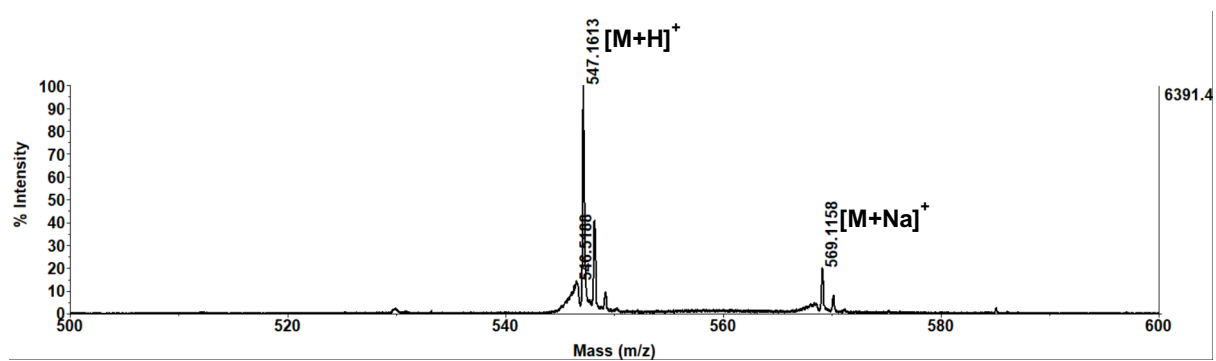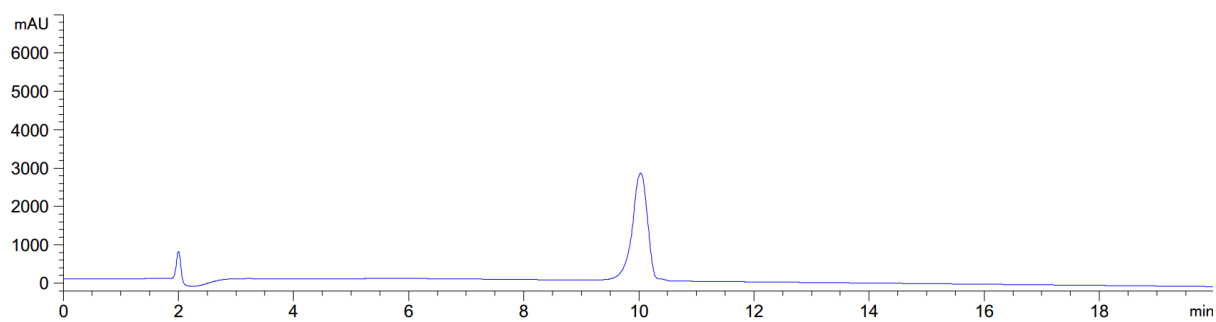

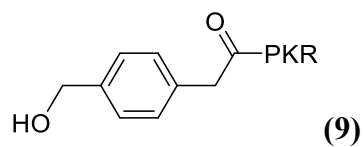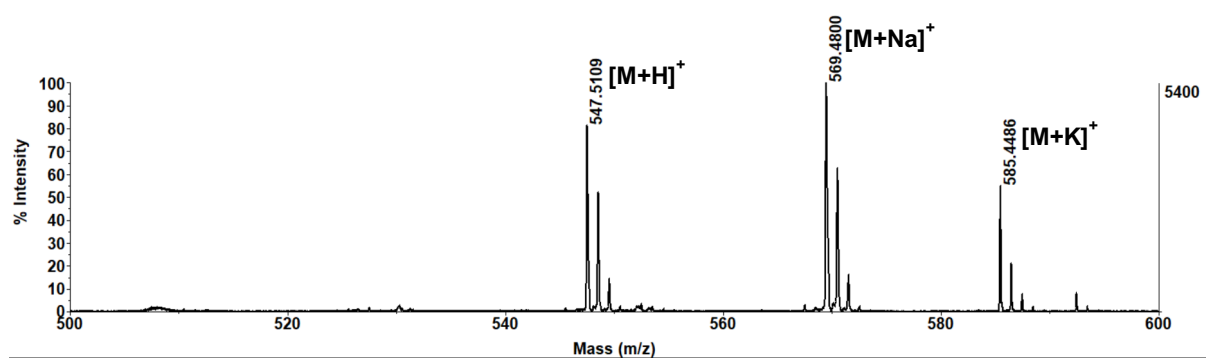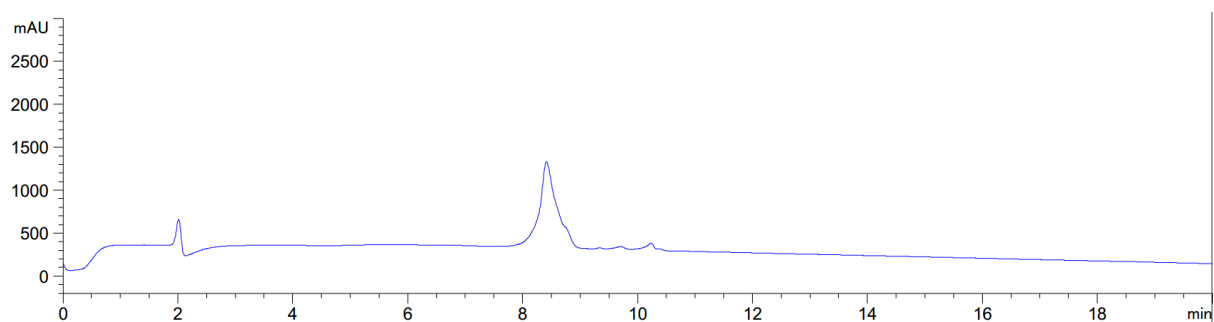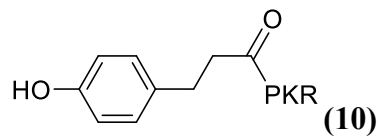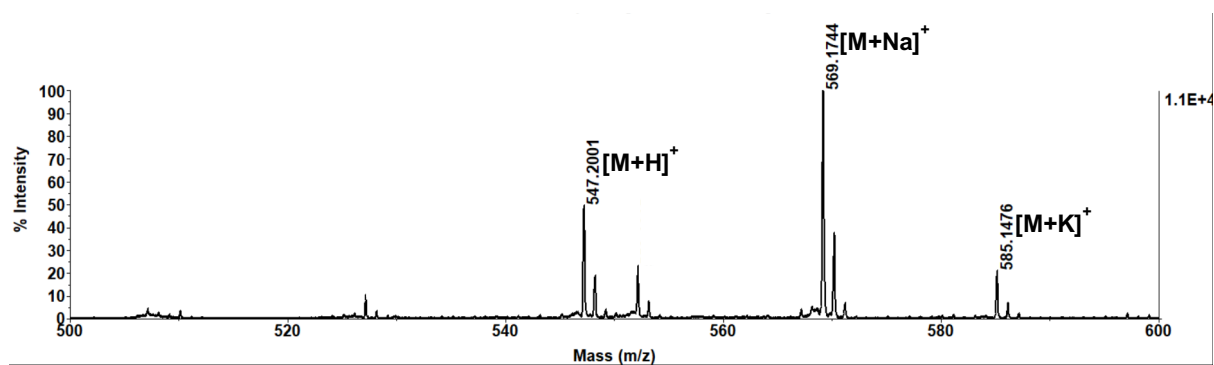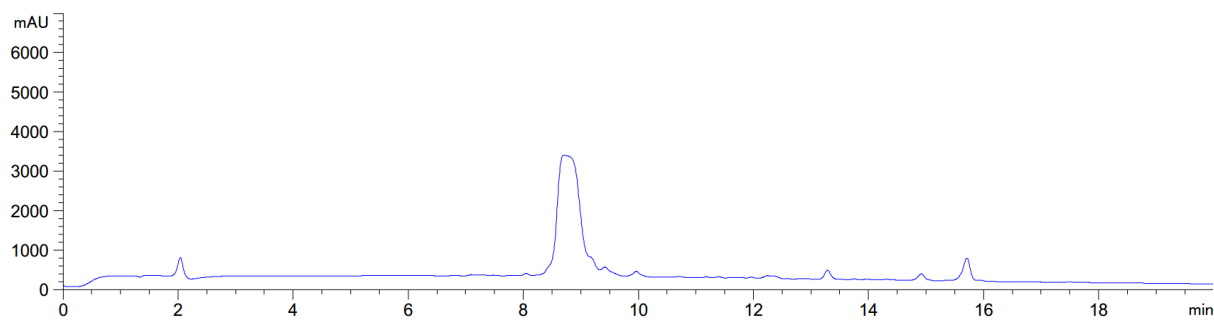

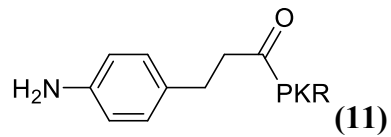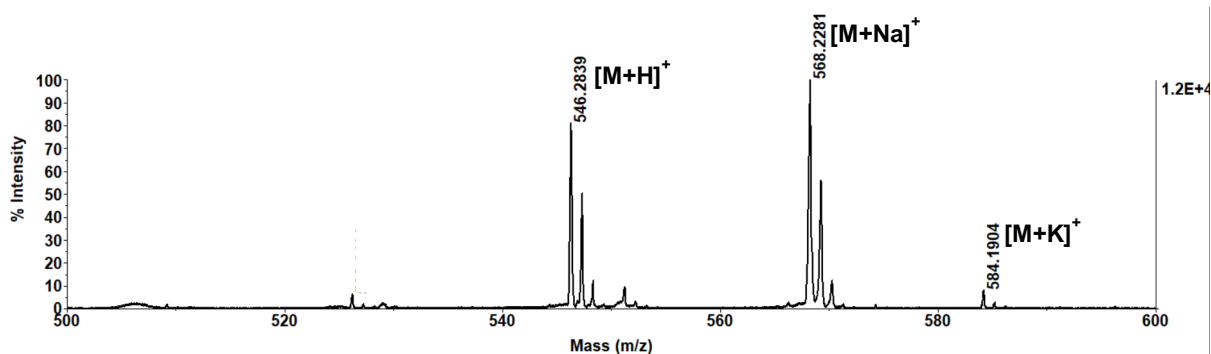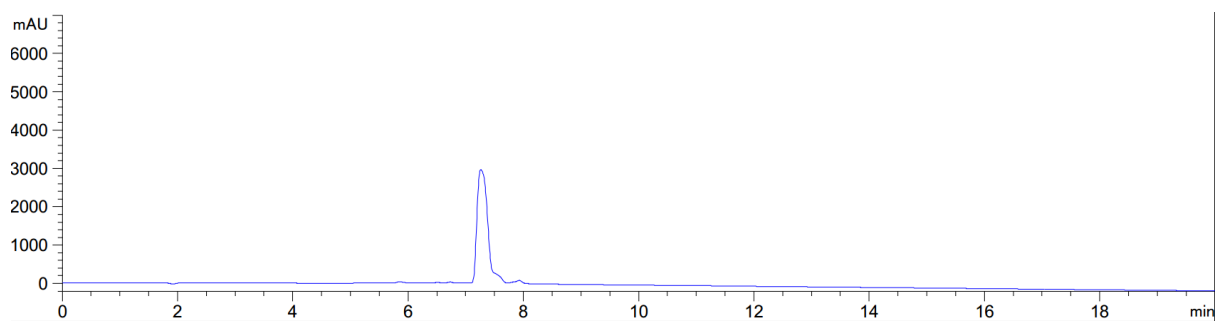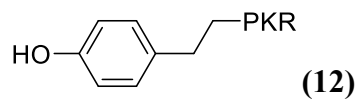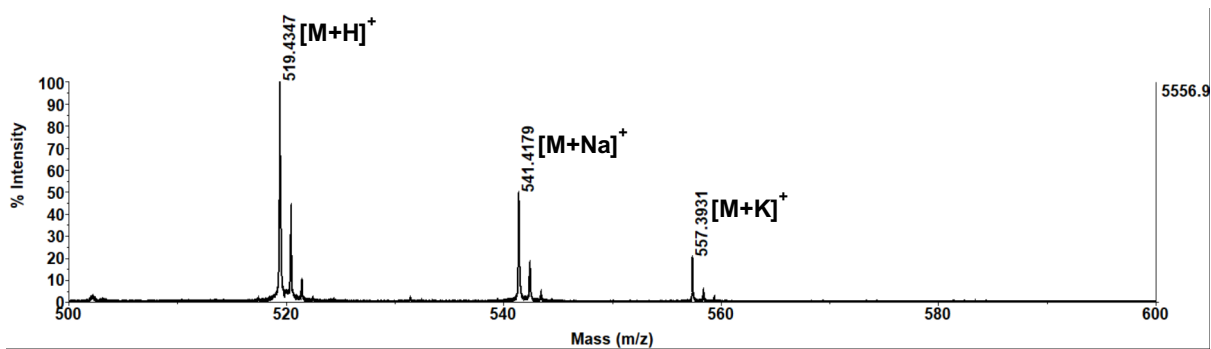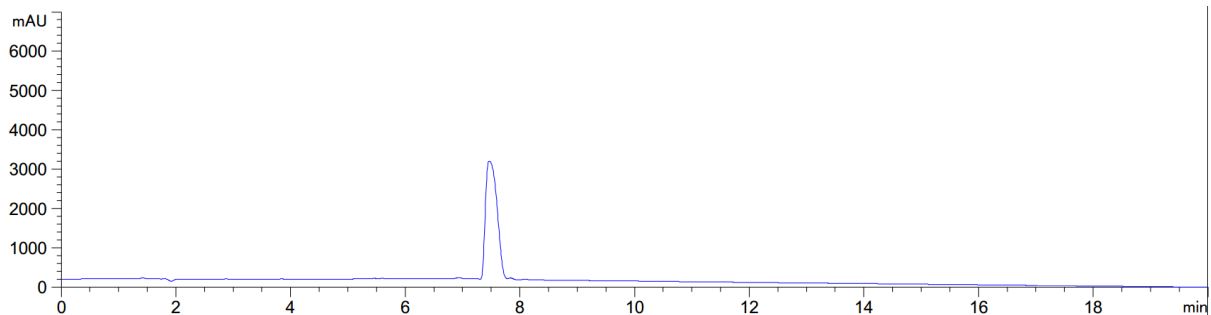



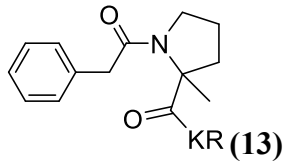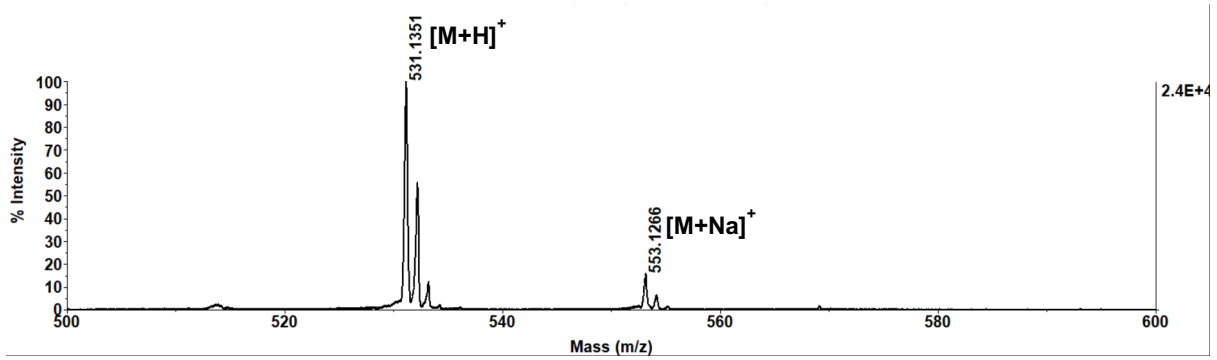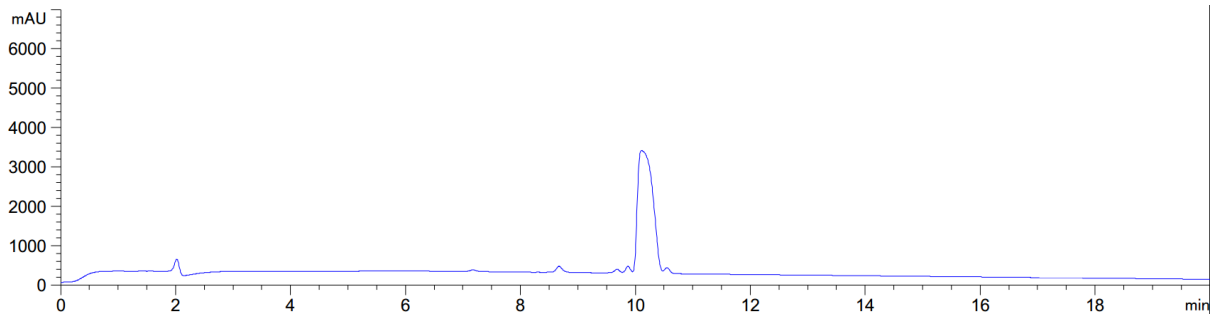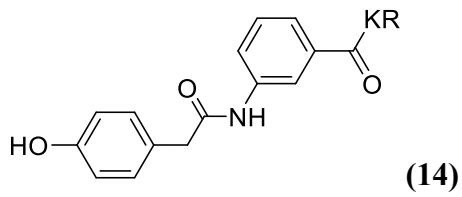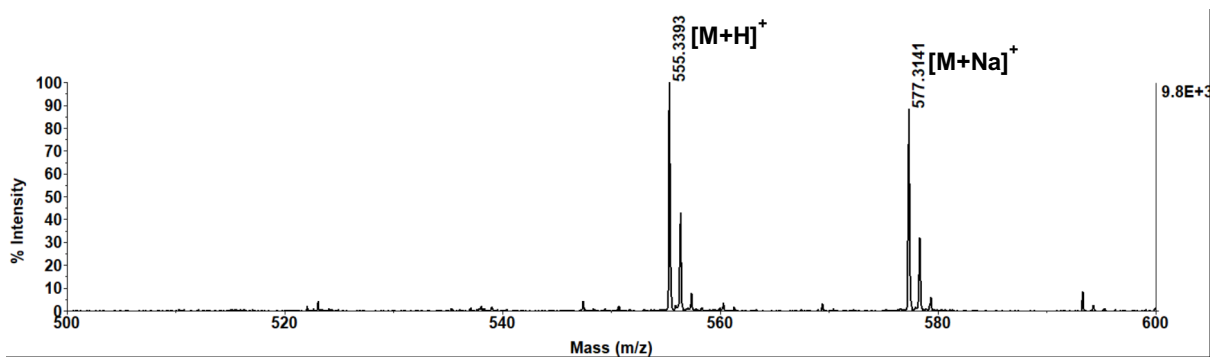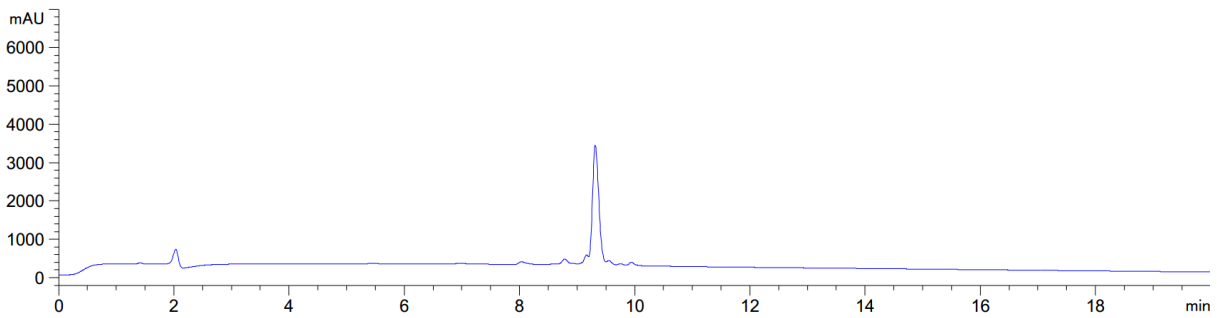

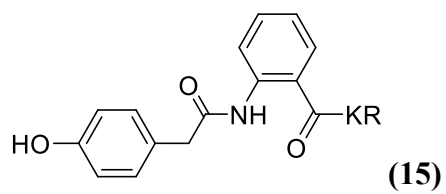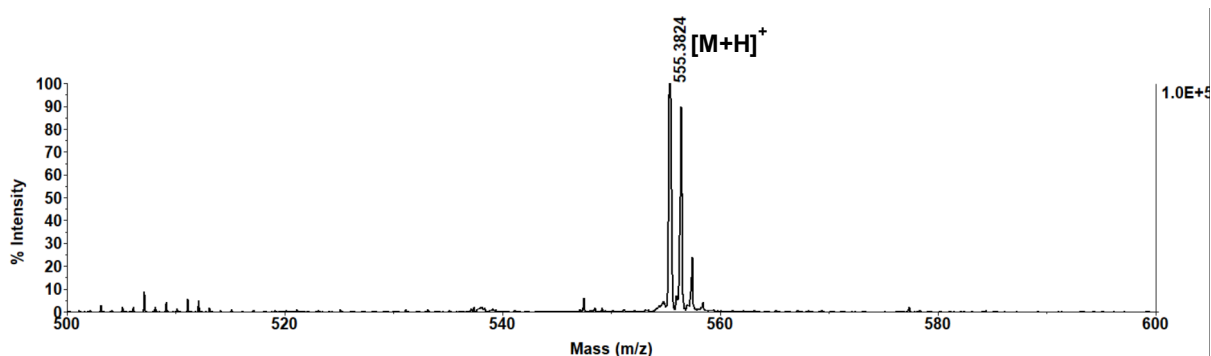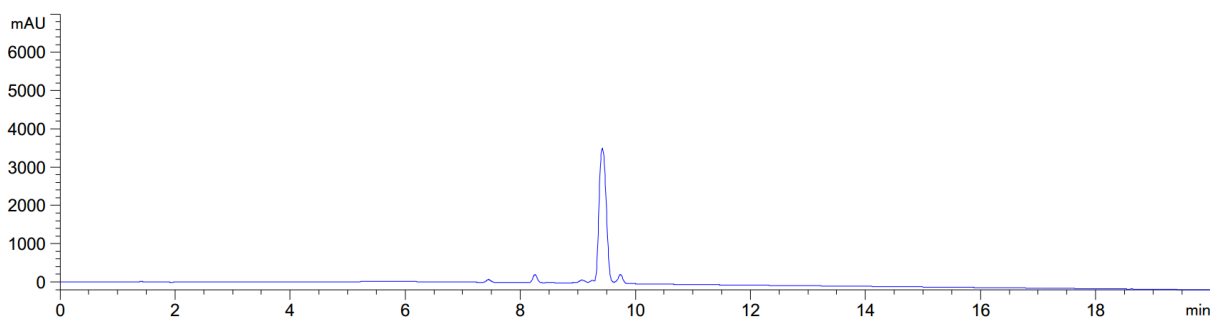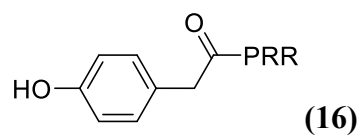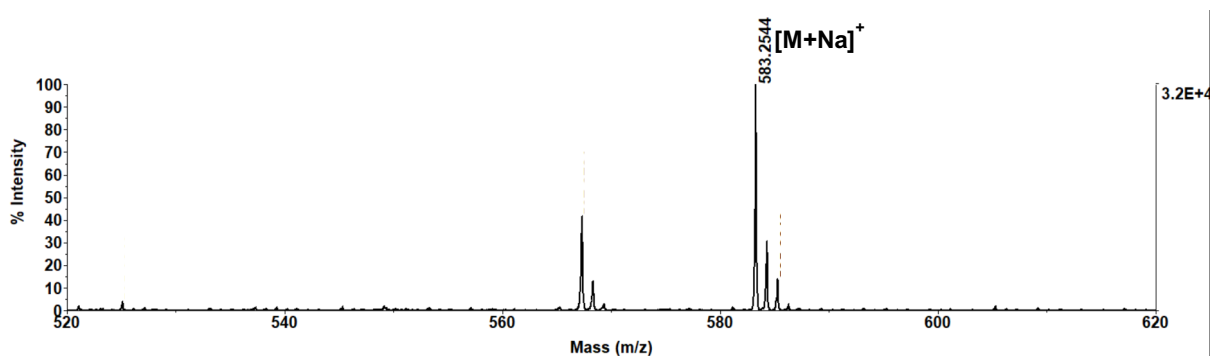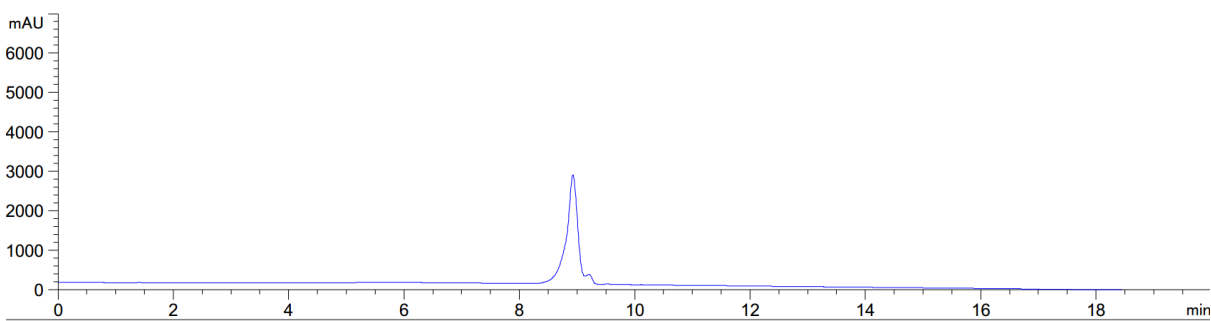

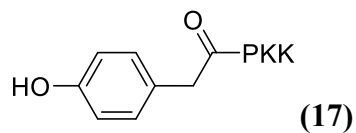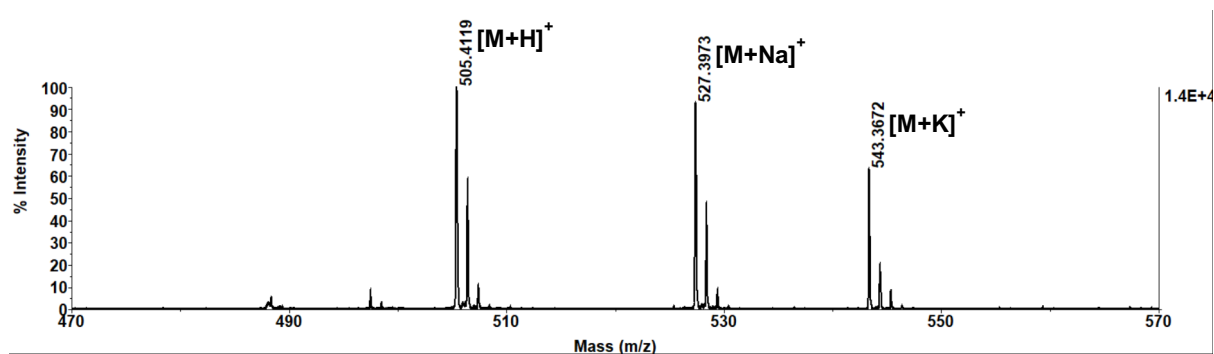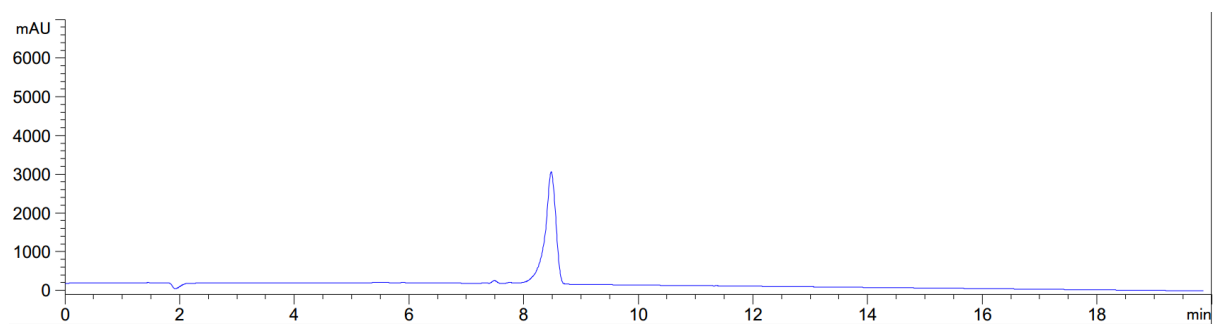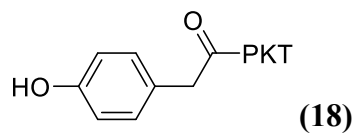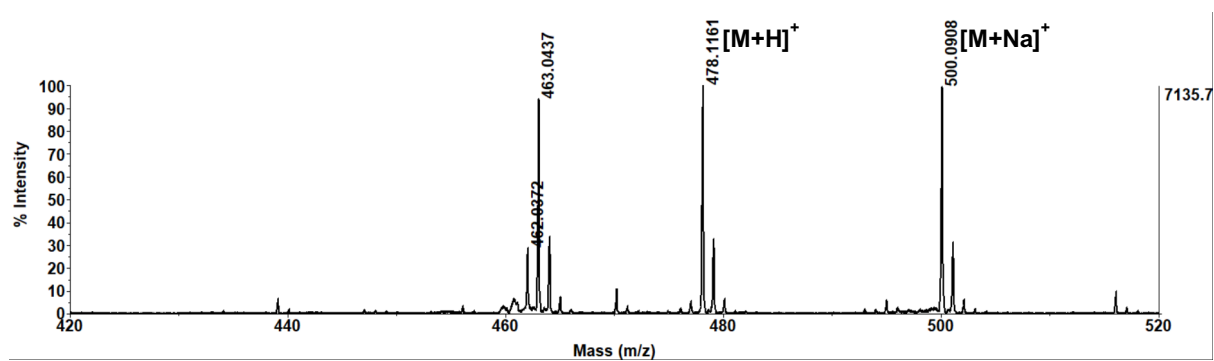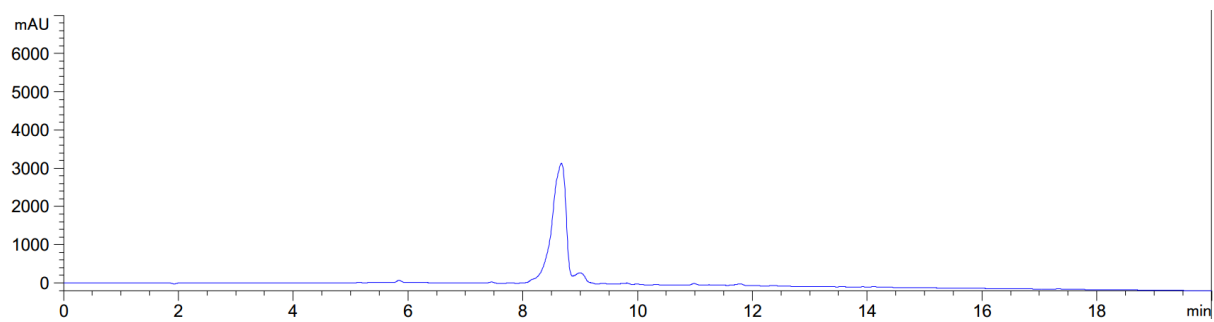

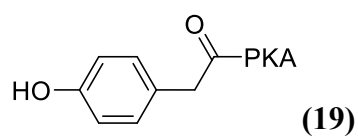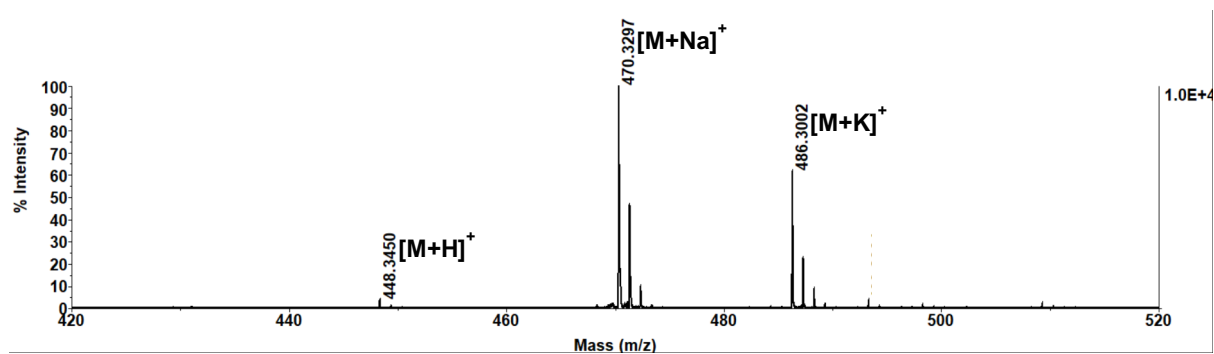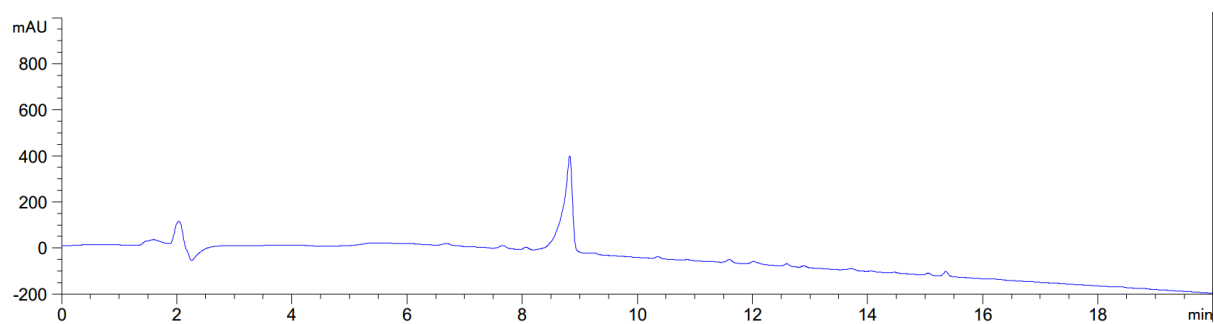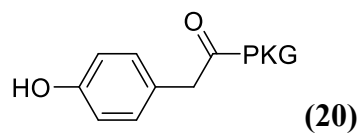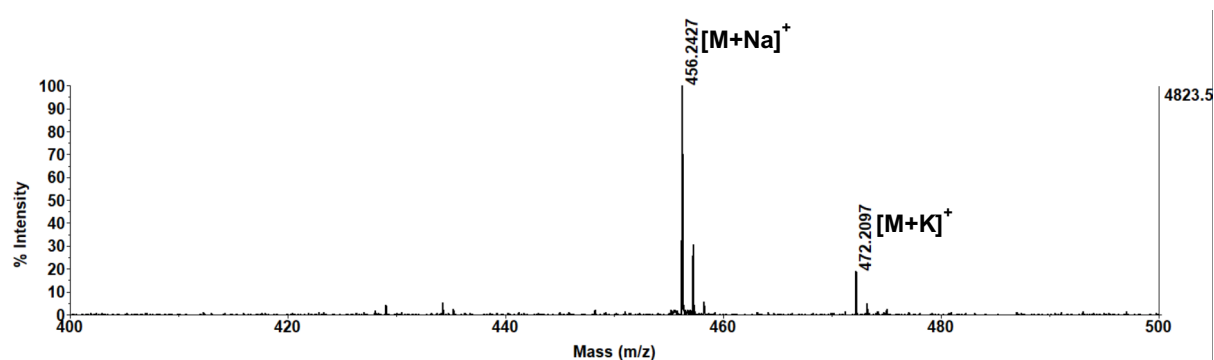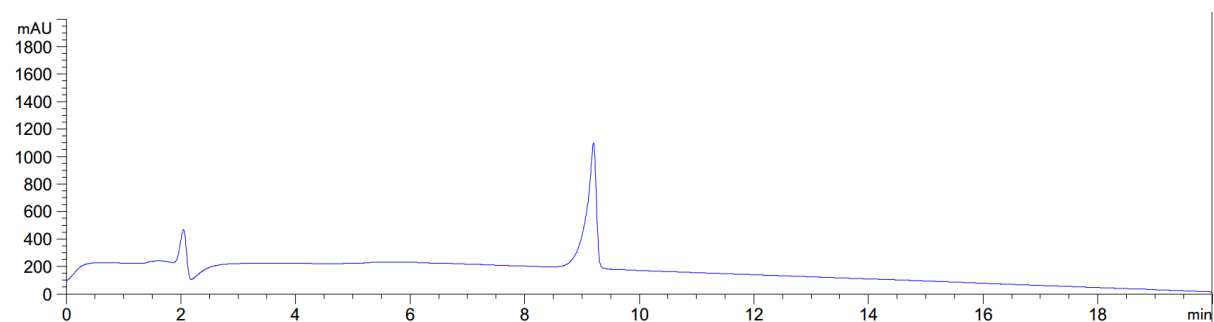

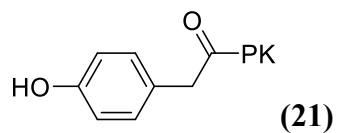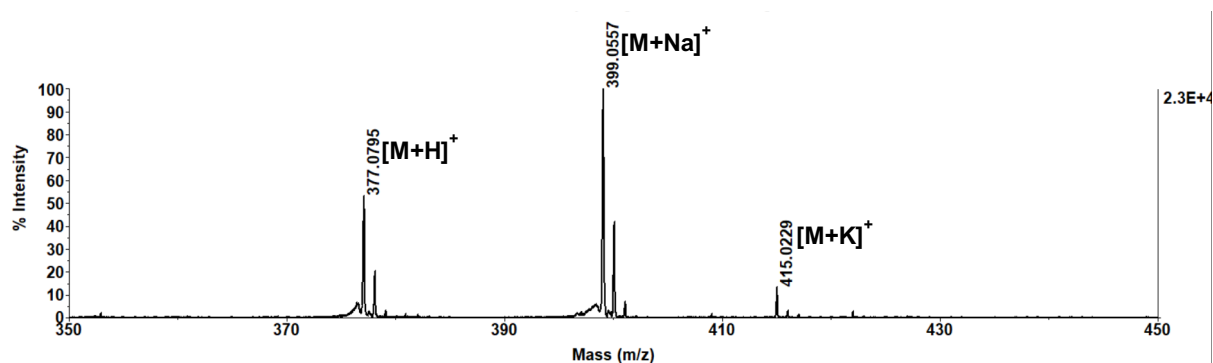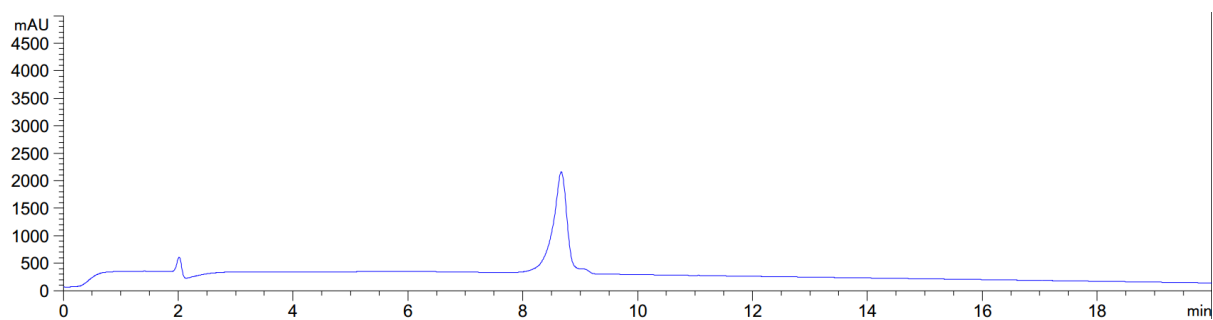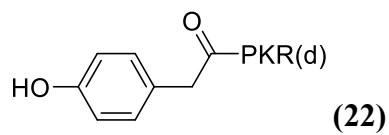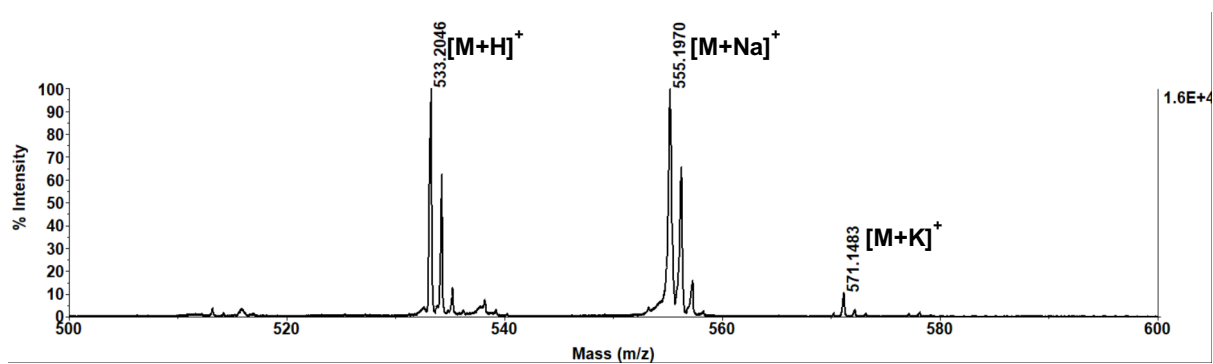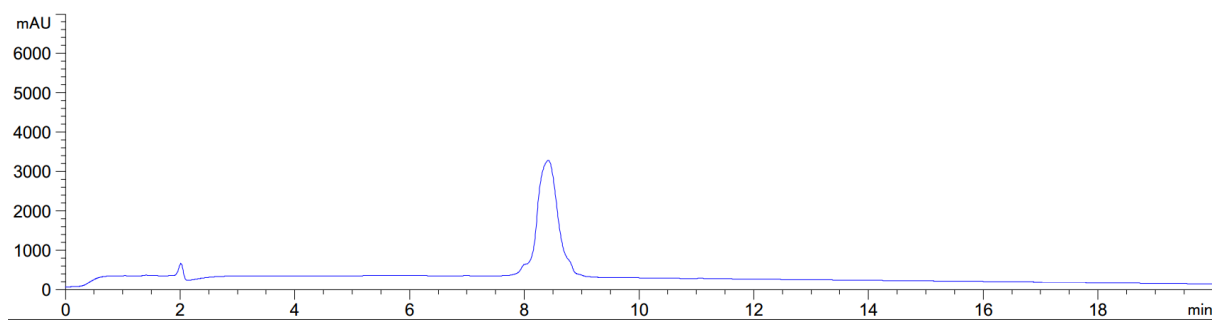

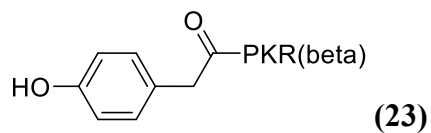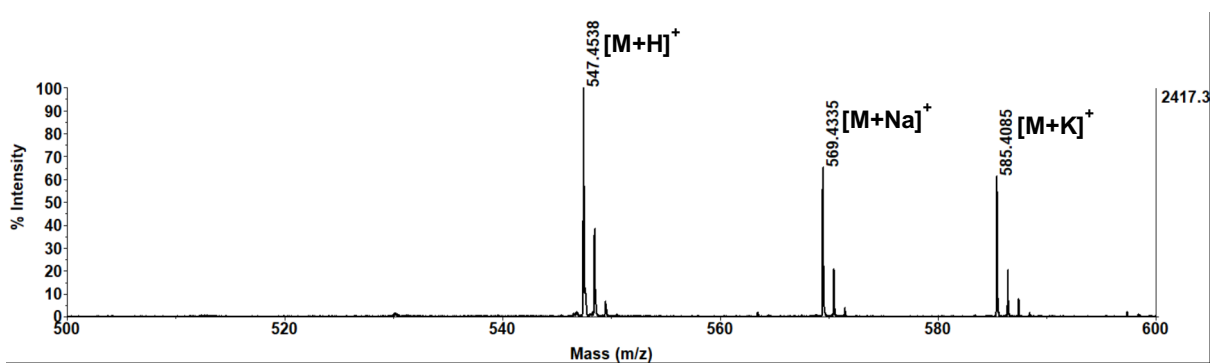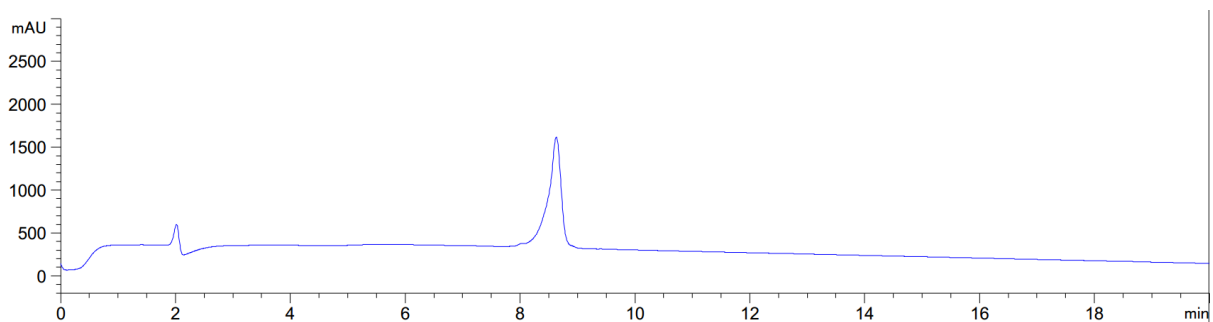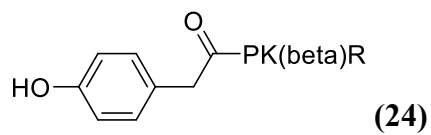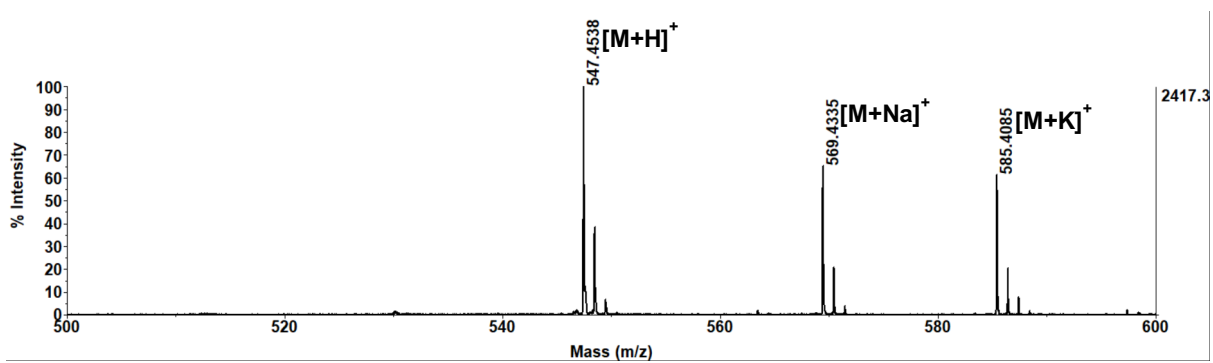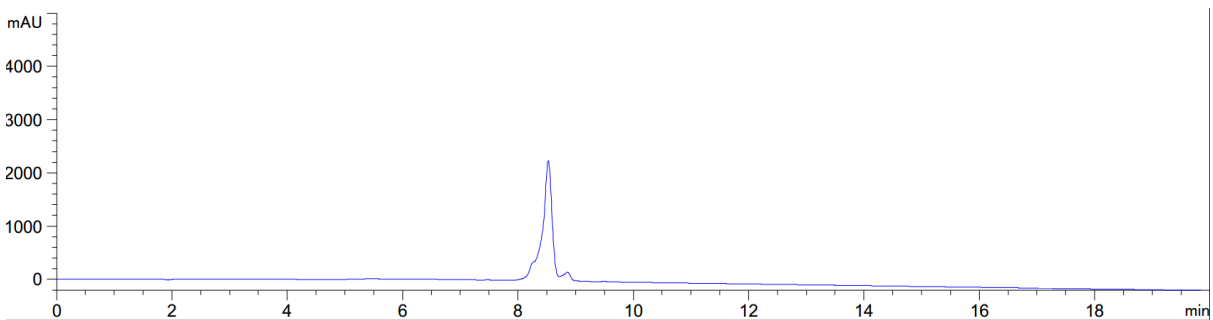

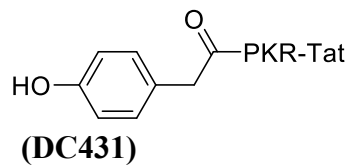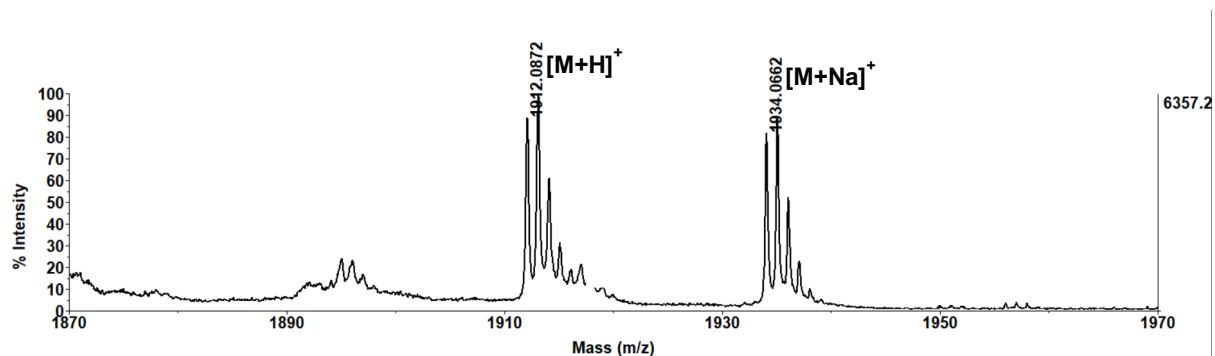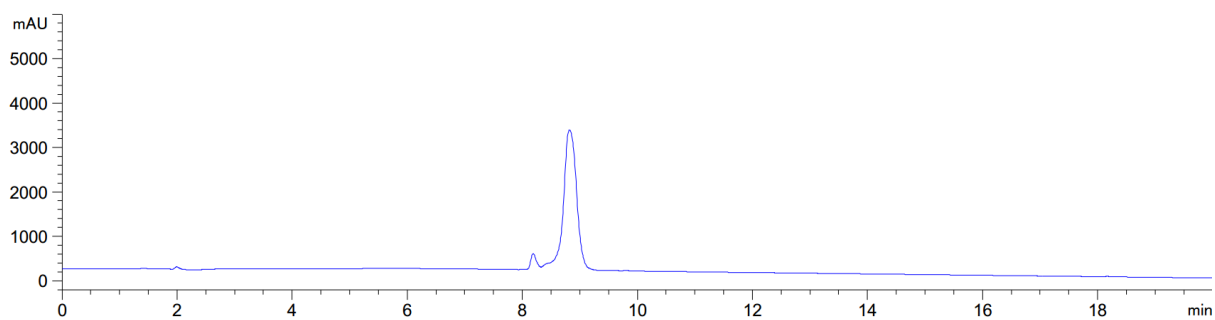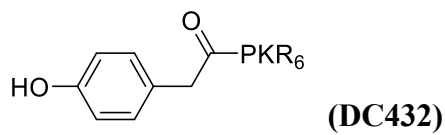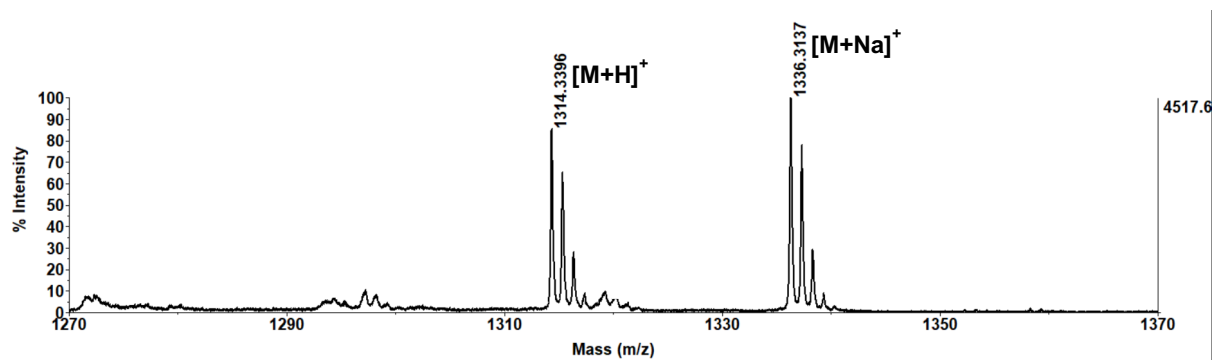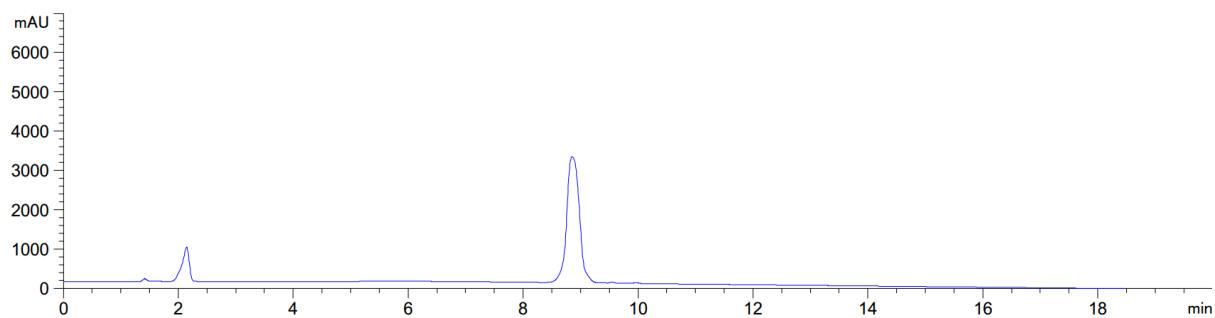

**Figure S2.** IC<sub>50</sub> curves of compounds **5**. IC<sub>50</sub> values were determined in triplicates (n = 3) and presented as mean ± SD

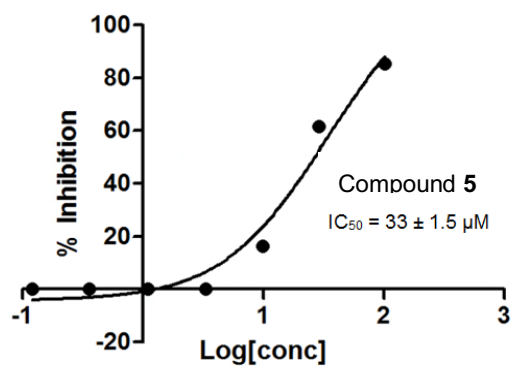



**Figure S3.** IC<sub>50</sub> curve of **BM30** (6). IC<sub>50</sub> values were determined in triplicates (n = 3) and presented as mean ± SD

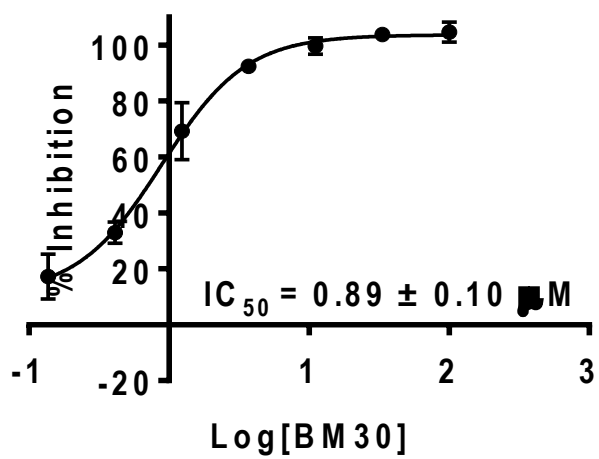

Figure S4. Cell permeability evaluation

10  $\mu$ M DC432

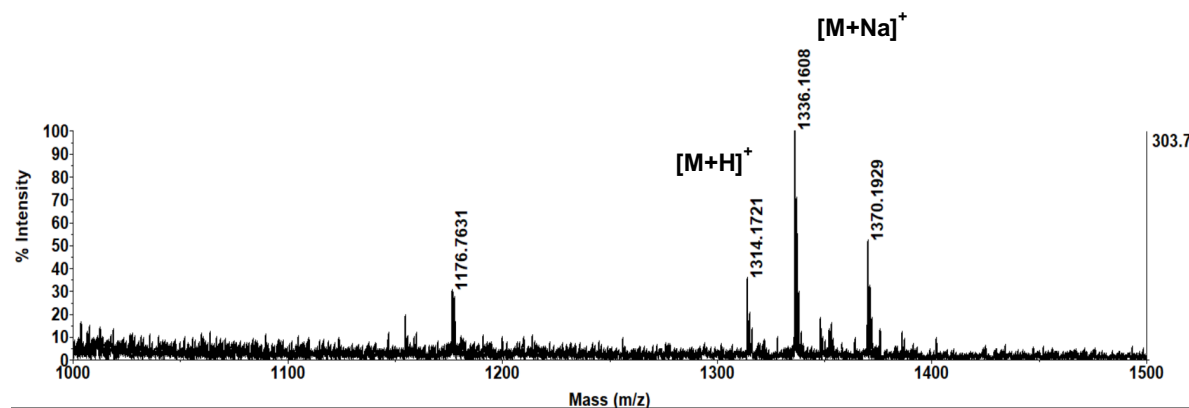

1  $\mu$ M DC432

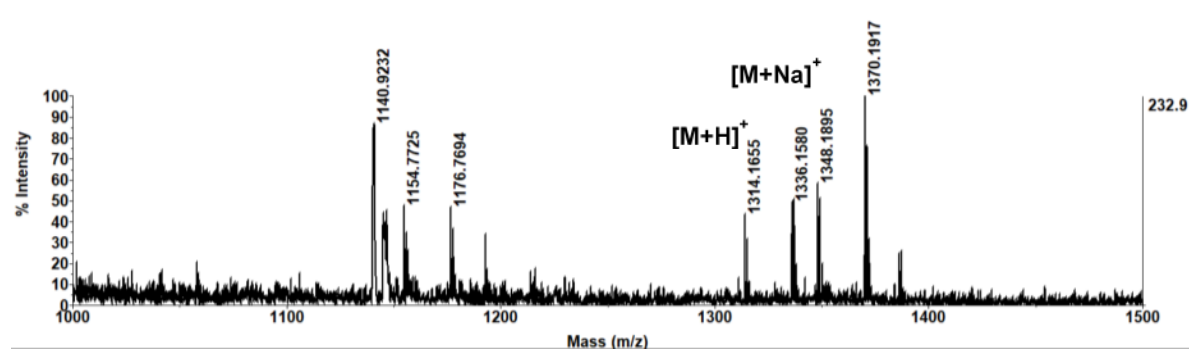

Last wash of cells incubated with 10  $\mu$ M DC432

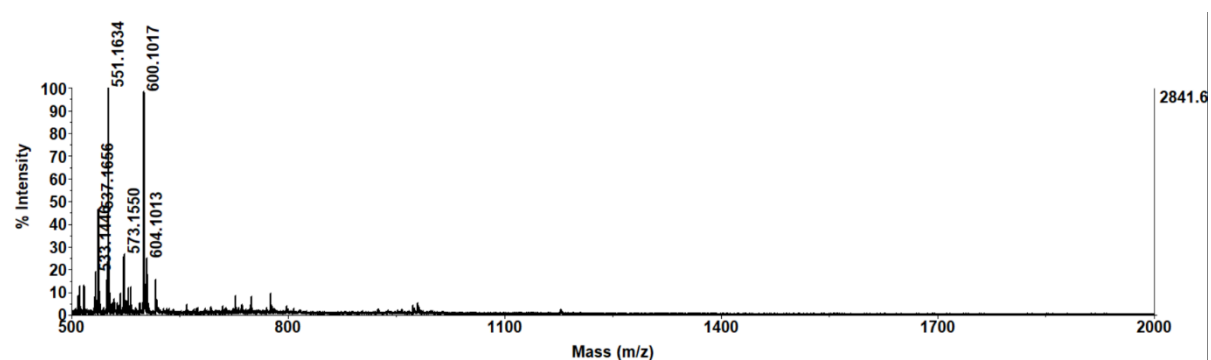

Last wash of cells incubated with 1  $\mu$ M DC432

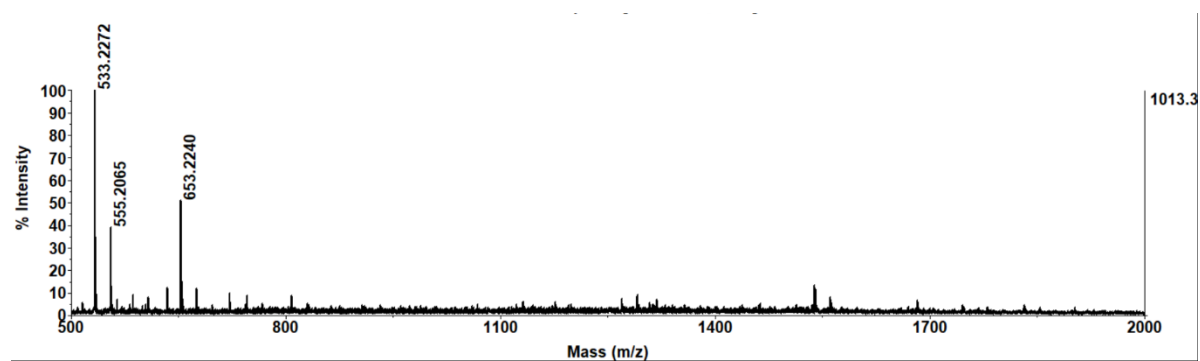

10  $\mu$ M DC431

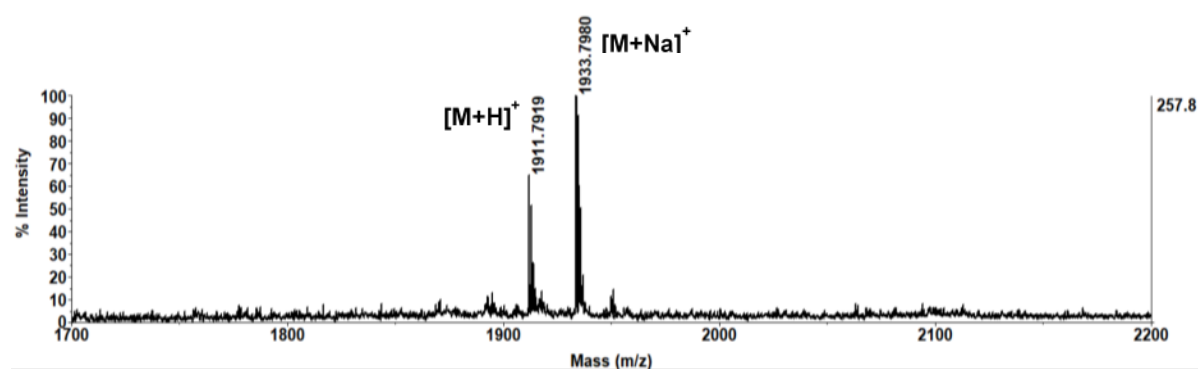

1  $\mu$ M DC431

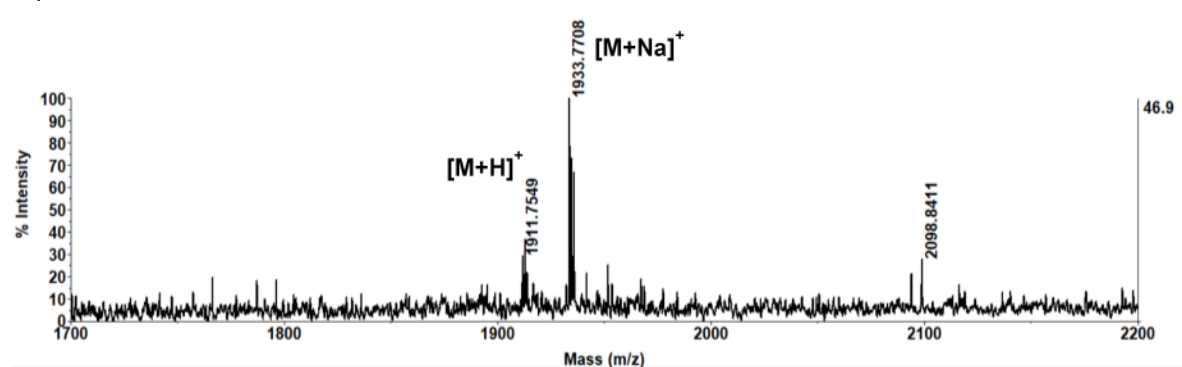

Last wash of cells incubated with 10  $\mu$ M DC431

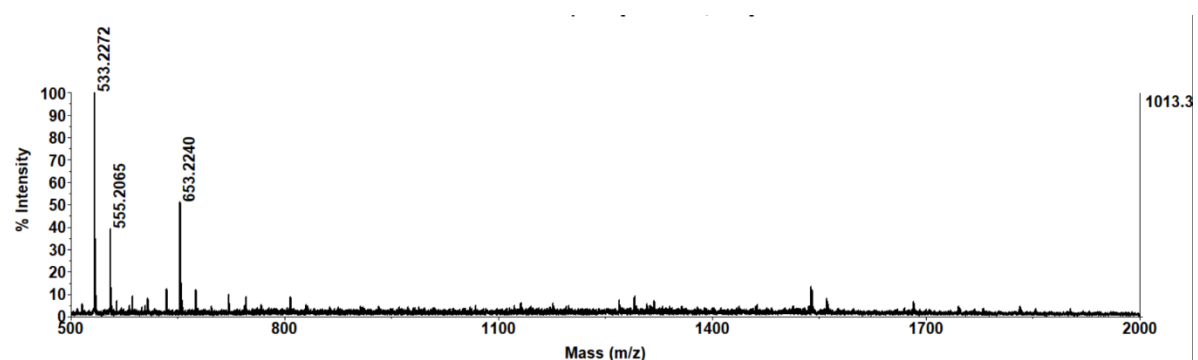

Last wash of cells incubated with 1  $\mu$ M DC431

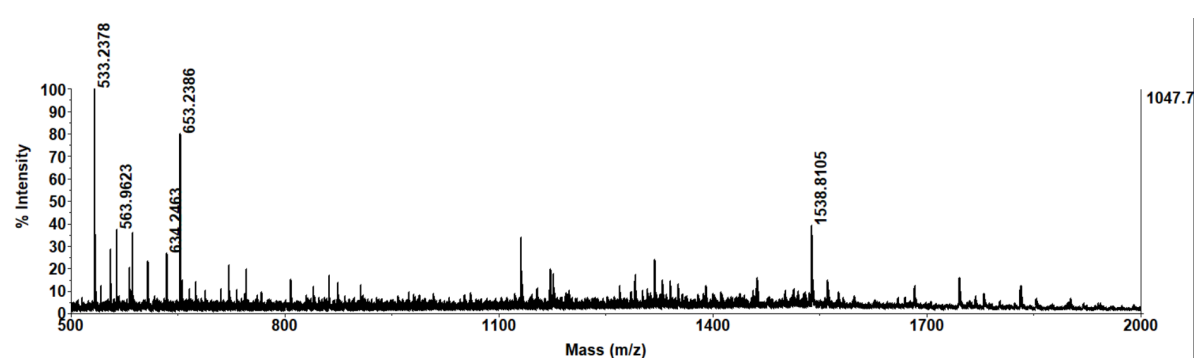

Cell lysate alone

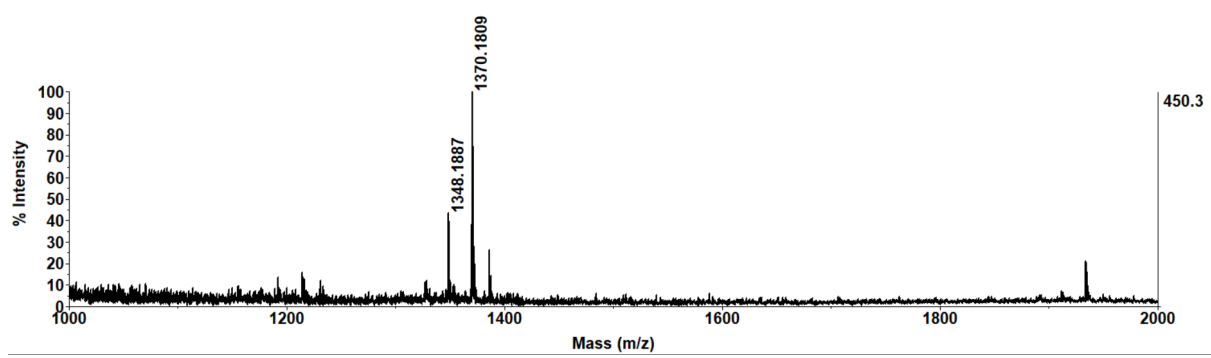

100  $\mu$ M BM-30

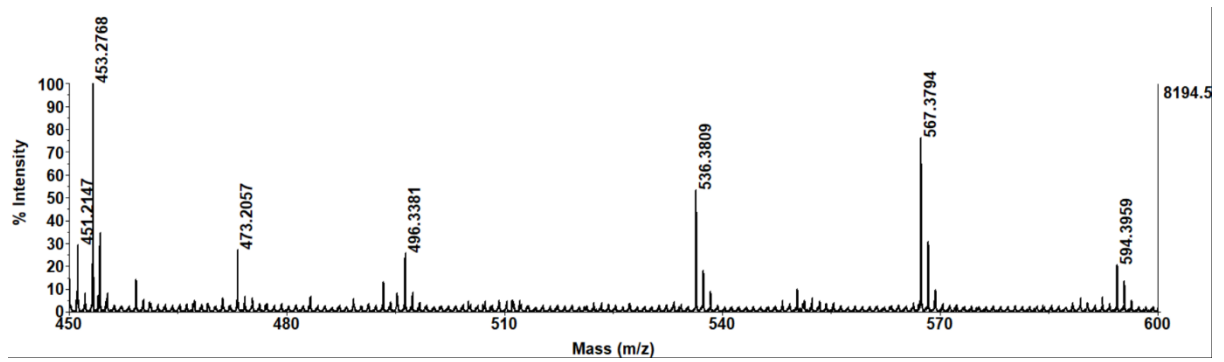

Cell lysate alone

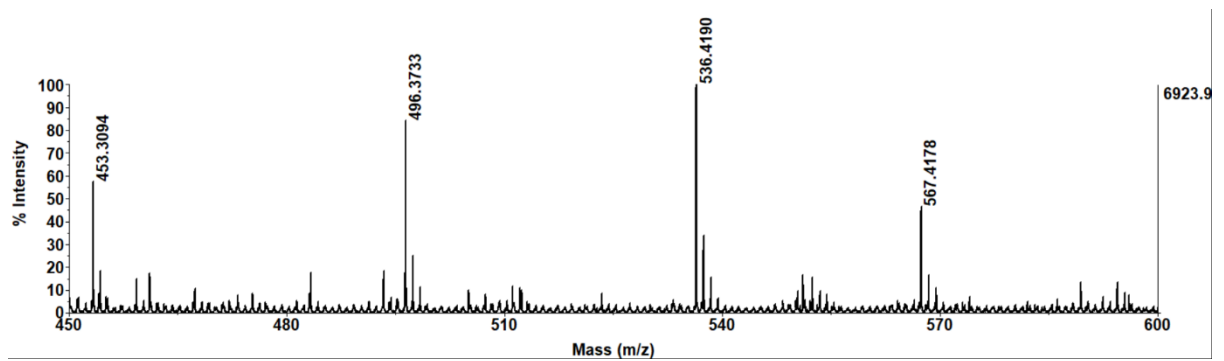

**Table S1.** Selectivity study of **BM30** and **22**

| Compound    | Structure                                                                         | IC <sub>50</sub> (μM) |        |       |
|-------------|-----------------------------------------------------------------------------------|-----------------------|--------|-------|
|             |                                                                                   | NTMT1                 | G9a    | PRMT1 |
| <b>BM30</b> | 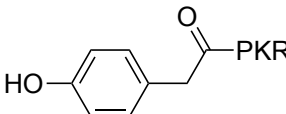 | 0.32±0.06             | >100   | >100  |
| <b>22</b>   |  | 4.2±1.2               | 13±4.1 | >100  |

**Table S2.** Selectivity study of compound BM30 against a panel of 41 MTases (Reaction Biology)<sup>a</sup>

| Enzyme              | Activity (mean, %) | SD (%) | n |
|---------------------|--------------------|--------|---|
| ASH1L               | 92                 | 4.6    | 2 |
| DNMT1               | 100                | 0.4    | 2 |
| DNMT3a              | 100                | 3.4    | 2 |
| DNMT3b              | 103                | 2.2    | 2 |
| DNMT3b/3L           | 118                | 0.6    | 2 |
| DOT1L               | 92                 | 1.9    | 2 |
| EZH1 Complex        | 112                | 0.9    | 2 |
| EZH2 Complex        | 104                | 2.1    | 2 |
| EZH2 (Y641F)        | 100                | 1.0    | 2 |
| G9a                 | 101                | 0.1    | 2 |
| GLP                 | 97                 | 6.8    | 2 |
| METTL21A-GST        | 95                 | 10.6   | 2 |
| MLL1 Complex        | 75                 | 0.9    | 2 |
| MLL2 Complex        | 85                 | 1.0    | 2 |
| MLL3 Complex        | 96                 | 0.4    | 2 |
| MLL4 Complex        | 84                 | 2.4    | 2 |
| NTMT1               | 11                 | 0.1    | 2 |
| NTMT2               | 12                 | 0.1    | 2 |
| NSD1                | 95                 | 0.4    | 2 |
| NSD2                | 102                | 0.7    | 2 |
| NSD2 (E1099K)       | 98                 | 2.7    | 2 |
| NSD2 (T1150A)       | 97                 | 5.4    | 2 |
| NSD3                | 91                 | 1.2    | 2 |
| PRDM9               | 100                | 0.3    | 2 |
| PRMT1               | 112                | 0.3    | 2 |
| PRMT3               | 98                 | 2.4    | 2 |
| PRMT4               | 104                | 3.7    | 2 |
| PRMT5               | 106                | 7.6    | 2 |
| PRMT5/MEP50 Complex | 106                | 2.3    | 2 |
| PRMT6               | 98                 | 8.0    | 2 |
| PRMT7               | 104                | 7.6    | 2 |
| PRMT8               | 100                | 10.8   | 2 |
| SET1b Complex       | 94                 | 5.5    | 2 |
| SET7/9              | 90                 | 4.2    | 2 |
| SET8                | 96                 | 5.1    | 2 |
| SETD2               | 100                | 3.2    | 2 |
| SMYD1               | 97                 | 0.7    | 2 |
| SMYD2               | 96                 | 0.6    | 2 |
| SUV39H1             | 99                 | 6.1    | 2 |
| SUV39H2             | 93                 | 1.8    | 2 |
| SUV420H1TV2         | 99                 | 3.4    | 2 |

<sup>a</sup> Selectivity of **BM30** was determined at concentration of 100  $\mu$ M for duplicate (n=2).

**Table S3.** Crystallography data and refinement statistics

| <b>Data Collection</b>                   | <b>NTMT1-BM30</b>       |
|------------------------------------------|-------------------------|
| $\lambda$ (Å)                            | 1.0332                  |
| Space group                              | P6 <sub>5</sub> 22      |
| a, b, c (Å)                              | 106.9, 106.9, 205.4     |
| $\alpha$ , $\beta$ , $\gamma$ (°)        | 90, 90, 120             |
| Resolution (Å)*                          | 30 – 1.73 (1.76 – 1.73) |
| Completeness (%)*                        | 99.9 (98.1)             |
| Redundancy*                              | 19.4 (18.7)             |
| $R_{\text{sym}}$ †*                      | 0.21 (4.5)              |
| $I / \sigma(I)$ *                        | 12.8 (0.7)              |
| CC <sub>1/2</sub>                        | 1.0 (0.36)              |
|                                          |                         |
| <b>Refinement</b>                        |                         |
| Resolution (Å)                           | 30 – 1.73               |
| No. reflections                          | 72,828                  |
| $R^{\S}/R_{\text{free}}^{\P}$            | 0.18/0.20               |
|                                          |                         |
| <b>r.m.s. deviations</b>                 |                         |
| Bonds (Å)                                | 0.008                   |
| Angles (°)                               | 0.879                   |
| No. Protein atoms                        | 7088                    |
| No. Ligand atoms                         | 246                     |
| No. Waters                               | 564                     |
|                                          |                         |
| <b>B-factors (Å<sup>2</sup>)</b>         |                         |
| Wilson B                                 | 26.81                   |
| Protein                                  | 32.53                   |
| Ligands                                  | 41.43                   |
| Waters                                   | 40.42                   |
|                                          |                         |
| <b>Ramachandran Analysis<sup>¥</sup></b> |                         |
| Favored (%)                              | 98.9                    |
| Allowed (%)                              | 1.1                     |
| Outliers (%)                             | 0                       |
| PDB code                                 | 6WH8                    |

†  $R_{\text{sym}} = \sum_{hkl,j} (|I_{hkl} - \langle I_{hkl} \rangle|) / \sum_{hkl,j} I_{hkl}$ , where  $\langle I_{hkl} \rangle$  is the average intensity for a set of  $j$  symmetry related reflections and  $I_{hkl}$  is the value of the intensity for a single reflection within a set of symmetry-related reflections.

§  $R$  factor =  $\sum_{hkl} (|F_o| - |F_c|) / \sum_{hkl} F_o$  where  $F_o$  is the observed structure factor amplitude and  $F_c$  is the calculated structure factor amplitude.

¶  $R_{\text{free}} = \sum_{hkl,T} (|F_o| - |F_c|) / \sum_{hkl,T} F_o$ , where a test set,  $T$  (5% of the data), is omitted from the refinement.

¥ Performed using Molprobity within PHENIX.

\* Indicates statistics for last resolution shell shown in parenthesis.

**Table S4.** IC<sub>50</sub> values and binding affinities of BM30 and its cell-permeable analogs<sup>a</sup>

| Compound     | Structure                                                                         | IC <sub>50</sub> (μM) for NTMT1 | K <sub>d</sub> (μM) for NTMT1 | K <sub>d</sub> (μM) for NTMT2 |
|--------------|-----------------------------------------------------------------------------------|---------------------------------|-------------------------------|-------------------------------|
| <b>BM30</b>  | 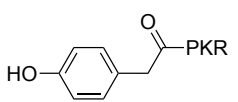 | 0.89±0.10                       | 3, 2.8                        | 3.7                           |
| <b>DC431</b> |  | 0.23± 0.03                      | 0.6, 0.8                      | 3.4                           |
| <b>DC432</b> |  | 0.054± 0.004                    | 0.3, 0.4                      | 1                             |

<sup>a</sup> IC<sub>50</sub> = mean±SD (n=3)
